# Supplementary material for: A high-performance asymmetric supercapacitor-based (CuCo)Se2/GA cathode and FeSe2/GA anode with enhanced kinetics matching
Source: Royal Society of Chemistry journal article supplement (doi:10.1039/d1nr00288k), 2021-01-01
Supplement: d1nr00288k1.pdf [file d1nr00288k1.pdf]

**High-performance asymmetric supercapacitor based (CuCo)Se<sub>2</sub>/GA cathode and FeSe<sub>2</sub>/GA anode with enhanced kinetics matching**

Zhen Tian,<sup>a,c</sup> Zhenxin Zhao,<sup>b</sup> Xiaomin Wang,<sup>b,\*</sup> Yanjun Chen,<sup>a,c</sup> Dan Li,<sup>a,c</sup> Yaoyao Linghu,<sup>a,c</sup>

Yongzhen Wang,<sup>b,\*</sup> and Chao Wang<sup>a,c,\*</sup>

<sup>a</sup> School of Materials Science and Engineering, North University of China, 030051 Taiyuan, China

<sup>b</sup> Collaborative Innovation Center of Advanced Energy Materials, Taiyuan University of Technology, 030024 Taiyuan, China

<sup>c</sup> Advanced Energy Materials and Systems Institute, North University of China, 030051 Taiyuan, China

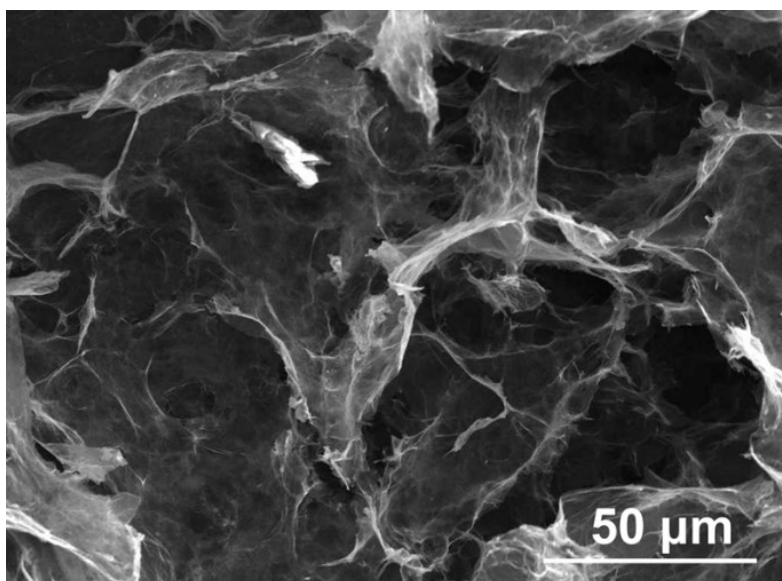

Fig. S1 SEM images of GA.

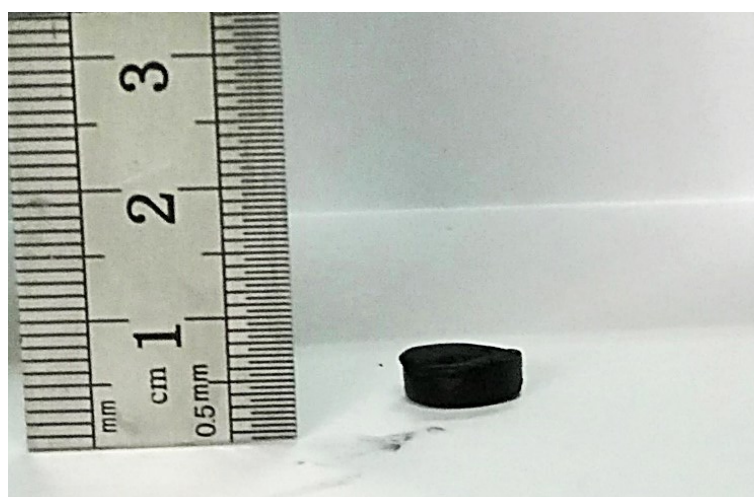

Fig. S2 Digital photo of the as-prepared (CuCo)Se<sub>2</sub>/GA.

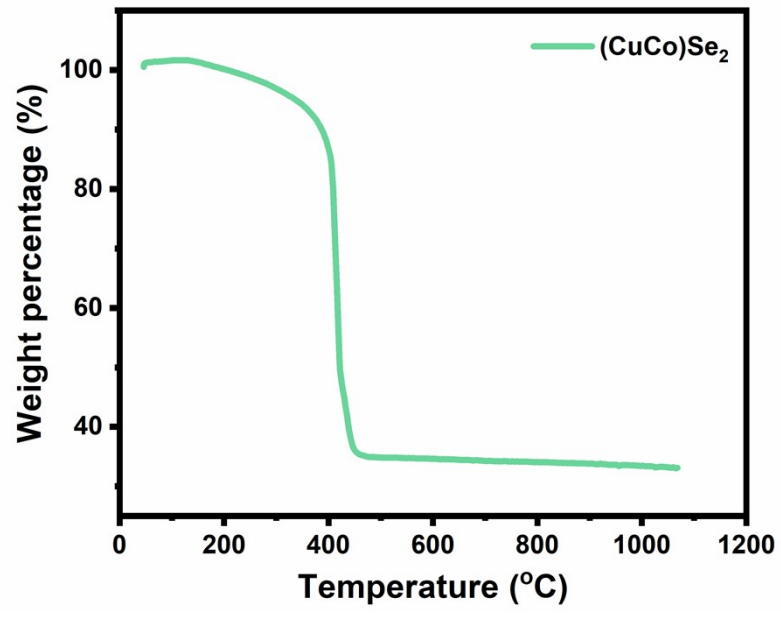

Fig.S3 TGA curve of the as-prepared (CuCo)Se<sub>2</sub>/GA.

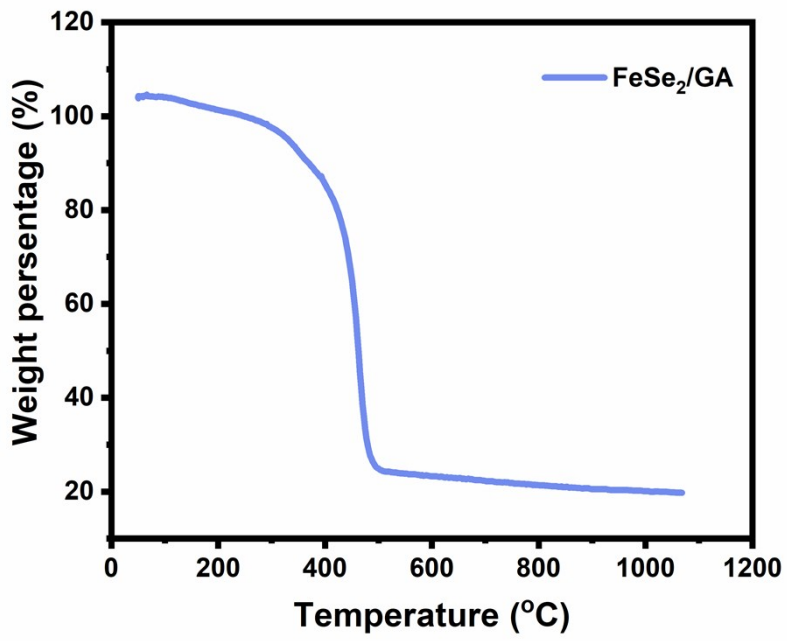

Fig.S4 TGA curve of the as-prepared FeSe<sub>2</sub>/GA.

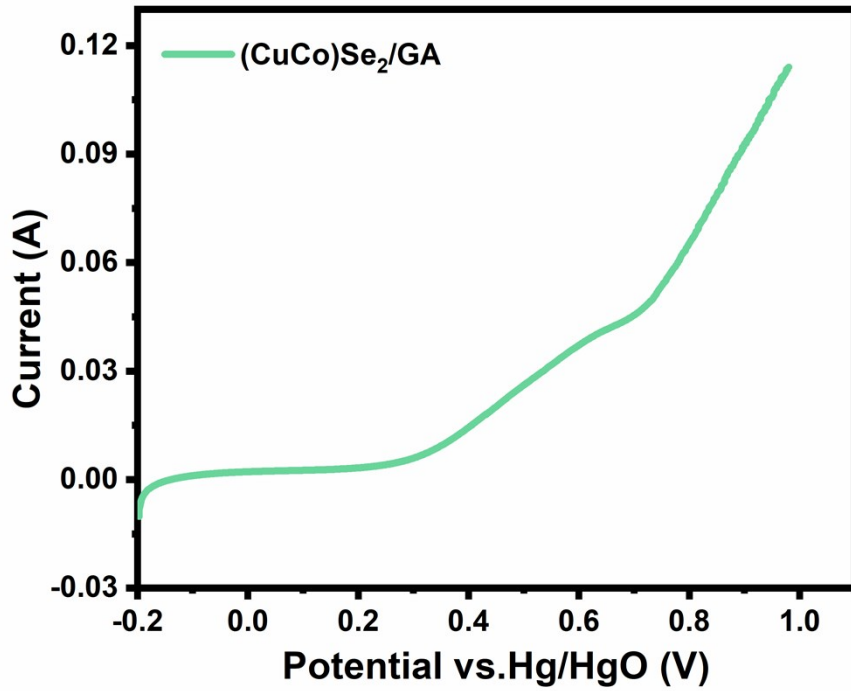

Fig.S5 LSV curve of (CuCo)Se<sub>2</sub>/GA electrode.

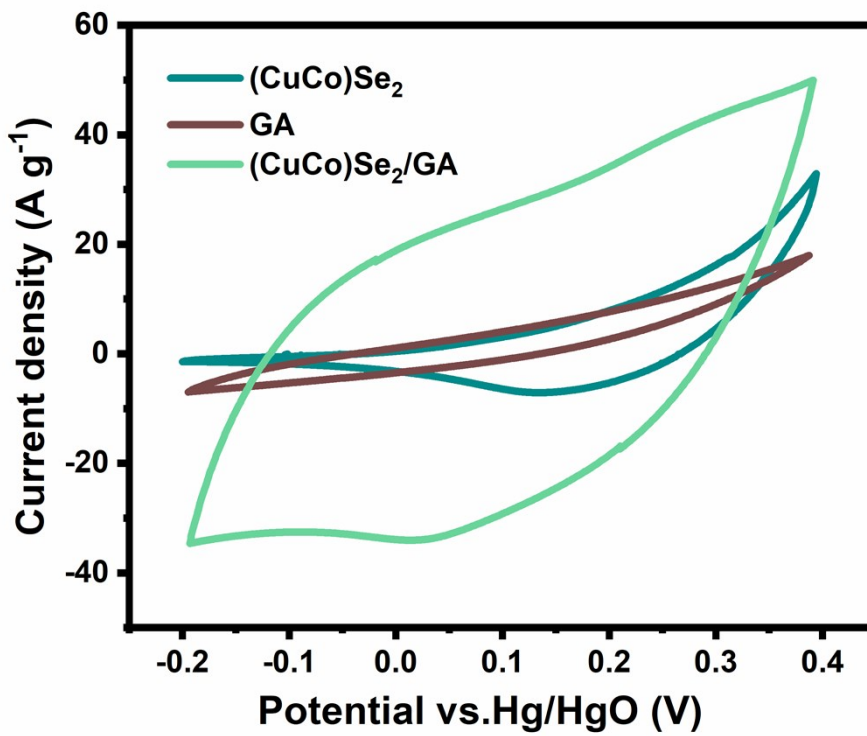

Fig.S6 Curves of pristine (CuCo)Se<sub>2</sub>, GA and (CuCo)Se<sub>2</sub>/GA at a scan rate of 100 mV s<sup>-1</sup>.

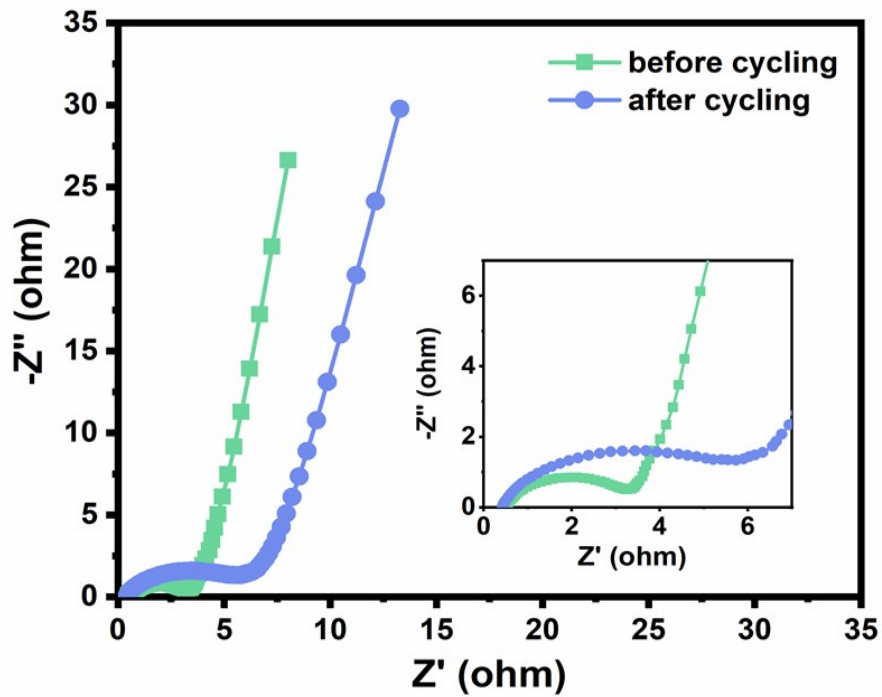

Fig.S7 Nyquist plots of (CuCo)Se<sub>2</sub>/GA electrode before and after cycling.

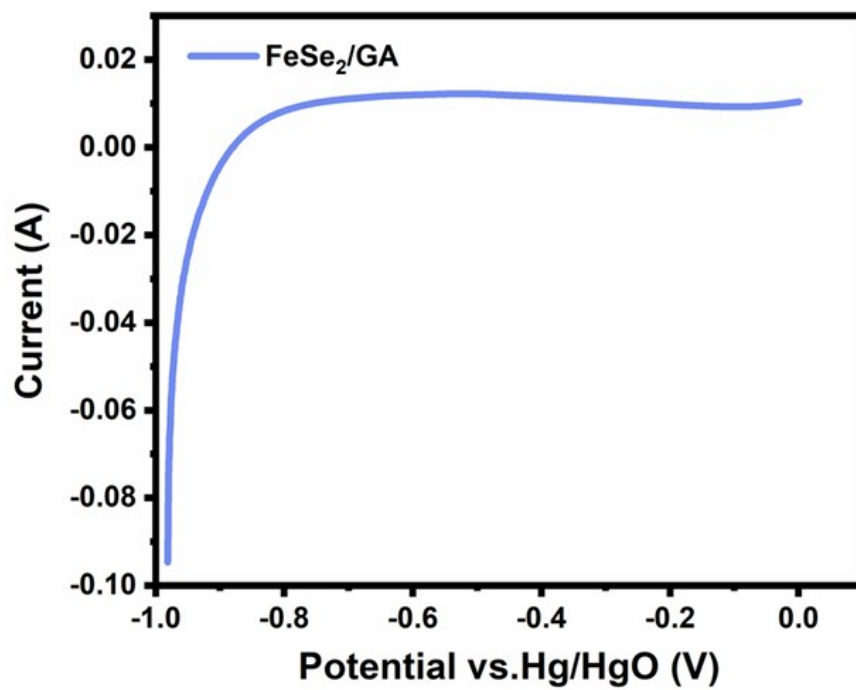

Fig.S8 LSV curve of FeSe<sub>2</sub>/GA electrode.

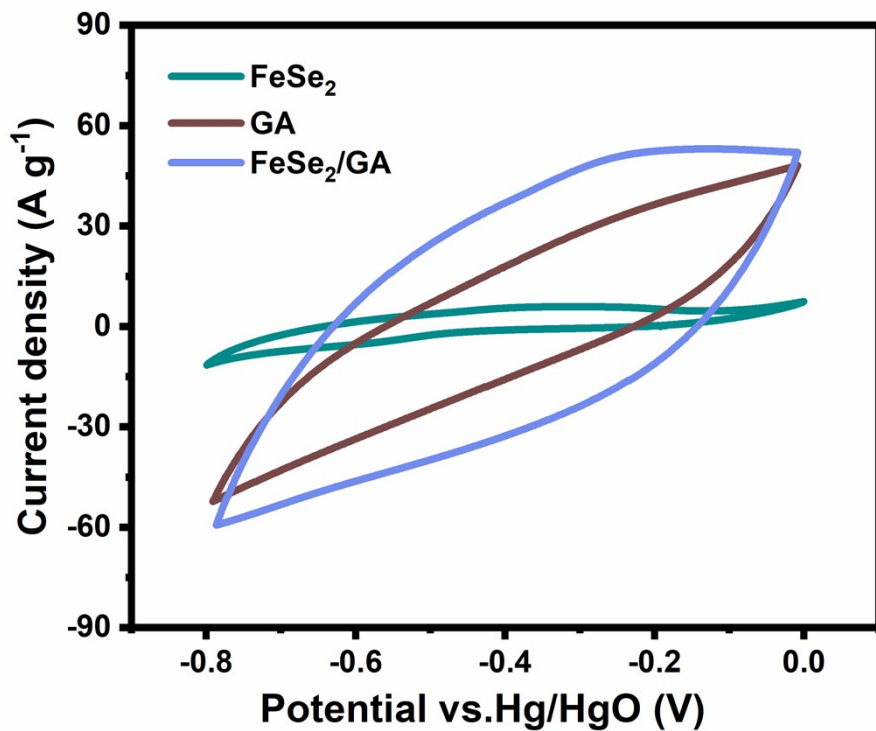

Fig.S9 Curves of pristine FeSe<sub>2</sub>, GA and FeSe<sub>2</sub>/GA at a scan rate of 100 mV s<sup>-1</sup>.

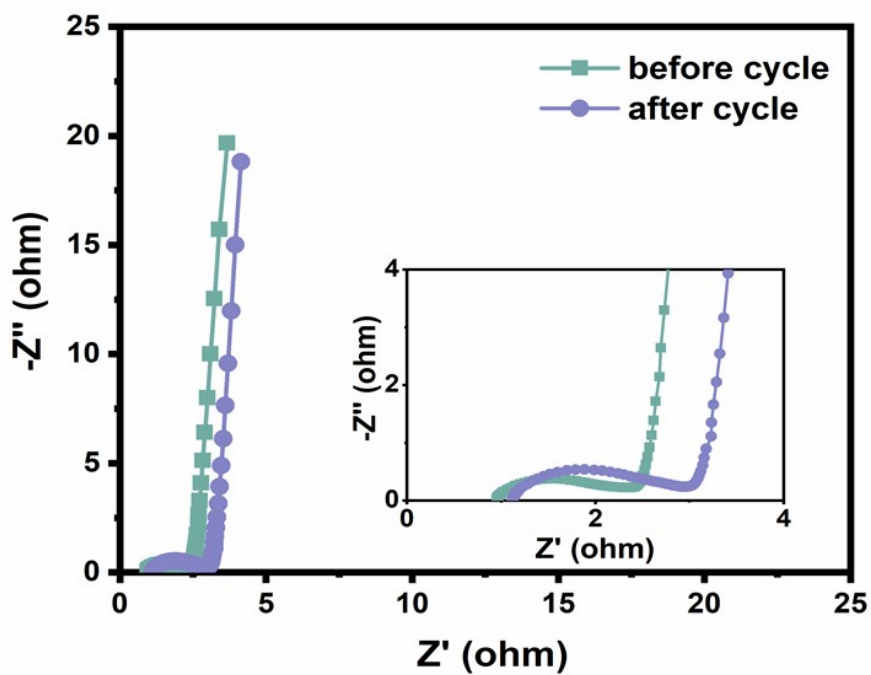

Fig.S10 Nyquist plots of FeSe<sub>2</sub>/GA electrode before and after cycling.

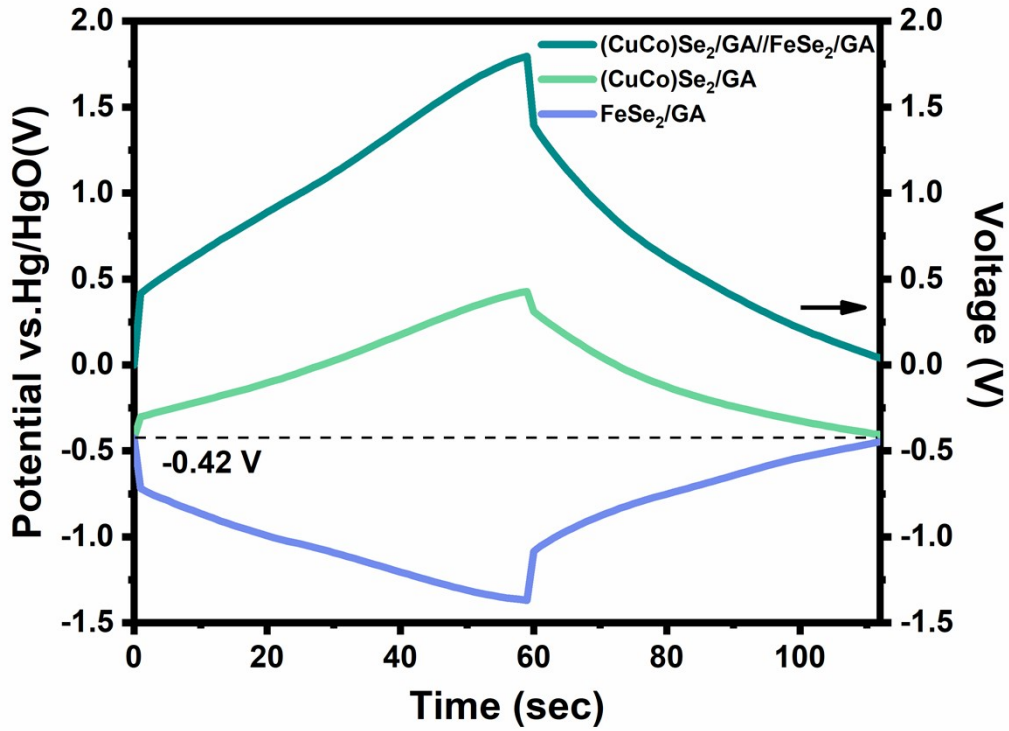

Fig.S11 Potential variation of the positive and negative electrode after cycling.

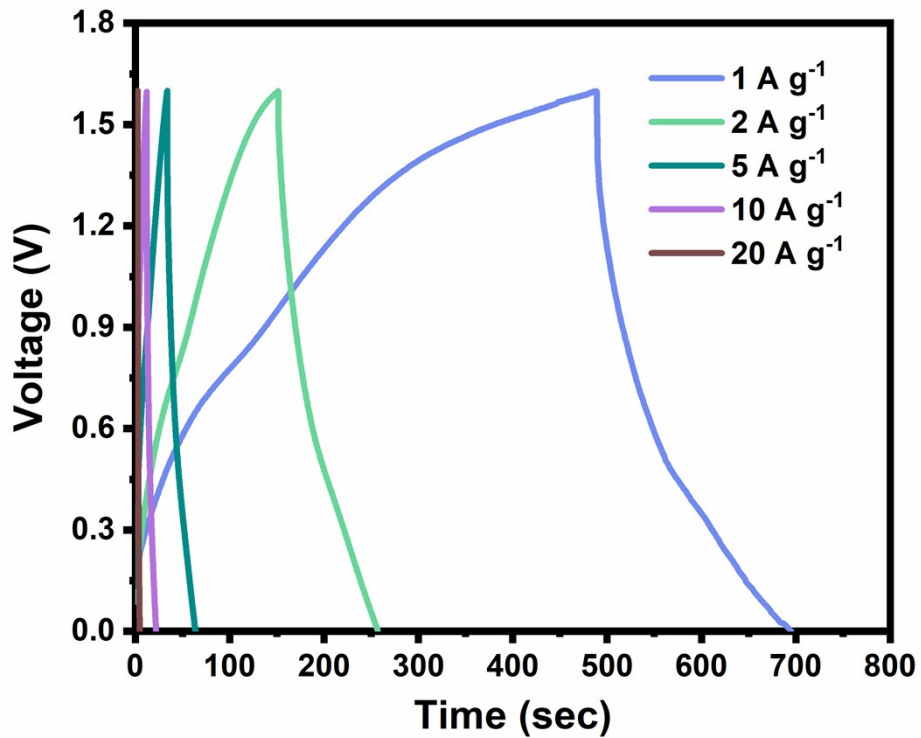

Fig.S12 GCD curves of the ASC at various current densities.

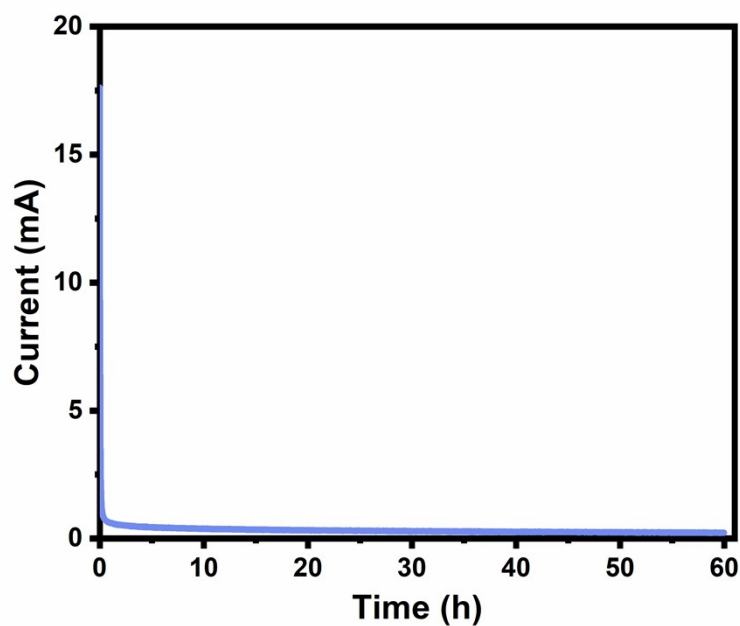

Fig.S13 Leakage current curve of the ASC.

Table S1. Textural parameters for (CuCo)Se<sub>2</sub>, FeSe<sub>2</sub> and GA.

| Materials             | $S_{\text{BET}}$ (m <sup>2</sup> g <sup>-1</sup> ) | $V_{\text{total}}$ (cm <sup>3</sup> g <sup>-1</sup> ) | $V_{\text{micro}}$ (cm <sup>3</sup> g <sup>-1</sup> ) |
|-----------------------|----------------------------------------------------|-------------------------------------------------------|-------------------------------------------------------|
| (CuCo)Se <sub>2</sub> | 13.9                                               | 0.068                                                 | 0.0008                                                |
| FeSe <sub>2</sub>     | 12.1                                               | 0.061                                                 | 0.0015                                                |
| GA                    | 77.3                                               | 0.096                                                 | 0.022                                                 |

Table S2. The calculation process for the content of selenides in two samples.

|                           | 2FeSe <sub>2</sub>    | → | Fe <sub>2</sub> O <sub>3</sub> | Retention%         |
|---------------------------|-----------------------|---|--------------------------------|--------------------|
| Relative molecular mass   | 427.5                 |   | 159.7                          | 159.7/427.5=37.4%  |
|                           |                       |   | FeSe <sub>2</sub> %            | 0.1976/0.374=52.8% |
| FeSe <sub>2</sub> /GA     |                       |   | GA%                            | 1-0.528= 47.2%     |
|                           | (CuCo)Se <sub>2</sub> | → | CuO+CoO                        | Retention%         |
| Relative molecular mass   | 280.4                 |   | 158.5                          | 158.5/280.4=56.5%  |
|                           |                       |   | (CuCo)Se <sub>2</sub> %        | 0.3313/0.565=58.6% |
| (CuCo)Se <sub>2</sub> /GA |                       |   | GA%                            | 1-0.586=41.4%      |
